# Supplementary material
Source: ML conference proceedings conference paper supplement (https://openreview.net/forum?id=_H7TNRQQeH8)
Supplement: supplementary_material [file attachment]

# Code

---

Paper ID: **6283**

Title: **Neural Dubber: Dubbing for Silent Videos According to Scripts**

---

In order to make the reviewers better understand our work, we have given the key part of the code. The complete code will be released after the paper is accepted.

Note that: In codes, we use video tts as neural dubber.

```
# Model architecture
video_tts.py

# Training code. We use a framework similar to Pytorch-Lightning
video_tts_task.py

# Dataset and dataloader
dataset.py
```
