# Supplementary material
Source: ML conference proceedings conference paper supplement (https://openreview.net/forum?id=_H7TNRQQeH8)
Supplement: supplementary_material [file attachment]

# Supplementary Material

---

Paper ID: **6283**

Title: **Neural Dubber: Dubbing for Silent Videos According to Scripts**

---

## Directory Structure

---

```
demo.mp4  # the demo video for Neural Dubbber
human_evaluation/  # the video clips for human evaluation.
                #Because the file is too big, only ten clips are selected for each
setting.
code/  # the key part of our project
```
